# Supplementary material for: Development of a multiplex real-time PCR assay for the simultaneous detection of four bacterial pathogens causing pneumonia
Source: PubMed Central journal article supplement (PMC8211157; doi:10.1371/journal.pone.0253402), 2021-06-17
Supplement: pone.0253402.s001.pdf [file pone.0253402.s001.pdf]

| Sample ID | Discordance type | Reference assays                    | RB4 mRT-PCR                                     |
|-----------|------------------|-------------------------------------|-------------------------------------------------|
| A         | Single infection | <i>K. pneumoniae</i>                | <i>K. pneumoniae, P. aeruginosa</i>             |
| B         |                  | <i>K. pneumoniae</i>                | <i>K. pneumoniae., P. aeruginosa</i>            |
| C         |                  | <i>K. pneumoniae</i>                | <i>K. pneumoniae, P. aeruginosa</i>             |
| D         |                  | <i>P. aeruginosa</i>                | <i>P. aeruginosa, M. catarrhalis</i>            |
| E         |                  | <i>P. aeruginosa</i>                | <i>K. pneumoniae, P. aeruginosa</i>             |
| F         |                  | <i>P. aeruginosa</i>                | <i>K. pneumoniae, P. aeruginosa</i>             |
| G         |                  | <i>S. aureus</i>                    | <i>K. pneumoniae, S. aureus</i>                 |
| H         |                  | <i>S. aureus</i>                    | <i>P. aeruginosa, S. aureus</i>                 |
| I         |                  | <i>M. catarrhalis</i>               | <i>K. pneumoniae, M. catarrhalis</i>            |
| J         |                  | <i>M. catarrhalis</i>               | <i>P. aeruginosa, M. catarrhalis</i>            |
| K         |                  | <i>K. pneumoniae, P. aeruginosa</i> | <i>K. pneumoniae, P. aeruginosa,, S. aureus</i> |
| L         |                  | <i>K. pneumoniae, S. aureus</i>     | <i>K. pneumoniae, P. aeruginosa, S. aureus</i>  |
| M         |                  | <i>K. pneumoniae, S. aureus</i>     | <i>K. pneumoniae, P. aeruginosa, S. aureus</i>  |
| N         |                  | <i>K. pneumoniae, S. aureus</i>     | <i>K. pneumoniae, P. aeruginosa, S. aureus</i>  |
| O         |                  | <i>P. aeruginosa, S. aureus</i>     | <i>K. pneumoniae, P. aeruginosa., S. aureus</i> |
| P         | mixed infections | <i>K. pneumoniae</i>                | <i>K. pneumoniae, P. aeruginosa, S. aureus</i>  |
| Q         |                  | <i>P. aeruginosa</i>                | <i>K. pneumoniae, P. aeruginosa, S. aureus</i>  |
| R         |                  | <i>S. aureus</i>                    | <i>K. pneumoniae, P. aeruginosa, S. aureus</i>  |
| S         |                  | <i>S. aureus</i>                    | <i>K. pneumoniae P. aeruginosa, S. aureus</i>   |
